# Supplementary material
Source: PubMed Central journal article supplement (PMC275472)
Supplement: nar_31_21_6321__1.pdf [file nar_31_21_6321__1.pdf]

**Table legends:** comparisons between the different categories of 5'ss. A, authentic 5'ss, C; cryptic 5'ss; M, mutant 5'ss; P1 and P2, pseudo 5'ss. S&S represents the score of the various 5'ss as calculated by the Shapiro and Senapathy matrix (33,34). S&S (A–C) refers to the difference between the S&S scores of the pairs of A and C 5'ss. Dist (A–C) is the distance in nucleotides between the pairs of A and C 5'ss. Numbers in bold are those that are an exception of the general trend (see text for details). Underlined numbers in Table S1 indicate first exons. In the 'S&S (M)' columns, N/A (not applicable) refers to those mutations that eliminate most of the 5'ss, hence their S&S score cannot be calculated. Averages (AVG) and standard deviations (SD) of every group of numbers are shown at the bottom of each table. In Table S6, Splice Id indicates the unique identifier number for alternative splicing events that is provided by the ASAP database. Alt 5'ss: alternative 5'ss.

| Gene       | Exon | Seq A       | Seq C       | S&S (A) | S&S (C) | S&S (A-C) | Dist (A-C) | DG (A) | DG (C) | DG(A)-DG(C) | Exon length A | Exon length C |
|------------|------|-------------|-------------|---------|---------|-----------|------------|--------|--------|-------------|---------------|---------------|
| ABCD1      | 1    | GAGGTGGGG   | CAGGTTGGG   | 79.05   | 75.74   | 3.31      | 9          | -11.2  | -11.8  | 0.6         | 1286          | 1295          |
| APOB       | 24   | AAGGTA AAA  | AAAGTAAAT   | 79.93   | 73.47   | 6.46      | 40         | -9.8   | -4.4   | -5.4        | 146           | 186           |
| AR         | 4    | CTGGTAAGG   | CAGGTGTAG   | 88.13   | 67.88   | 20.25     | -123       | -9.8   | -10.7  | 0.9         | 288           | 165           |
| ATM        | 45   | CAGGTA AACT | AGAGTGACT   | 86.38   | 63      | 23.38     | 71         | -11.9  | -4.5   | -7.4        | 218           | 289           |
|            |      | CAGGTA AACT | TTGGTCTTT   | 86.38   | 53.92   | 32.46     | 79         | -11.9  | -5.5   | -6.4        | 218           | 297           |
| BRCA1      | 5    | AAGGTATAT   | TATGTAAGA   | 74.52   | 78.01   | -3.49     | -22        | -8.9   | -7.5   | -1.4        | 78            | 56            |
|            | 16   | TTTGTGAGT   | TAGGTATTG   | 72.77   | 66.66   | 6.11      | 69         | -8.8   | -9.9   | 1.1         | 311           | 380           |
| CFTR       | 4    | AAGGTAATA   | ATTGTAGG    | 79.93   | 71.9    | 8.03      | -93        | -9.8   | -6.6   | -3.2        | 216           | 123           |
|            | 20   | CAGGTGAGC   | AAGCAACT    | 91.27   | 68.06   | 23.21     | 29         | -14.1  | -6.3   | -7.8        | 156           | 185           |
| COL1A1     | 8    | CCTGTGAGT   | TGGTAAGA    | 76.78   | 82.72   | -5.94     | 96         | -8.8   | -9.8   | 1           | 45            | 141           |
|            |      | CCTGTGAGT   | CTGGTGAGC   | 76.78   | 83.76   | -6.98     | 186        | -8.8   | -9.9   | 1.1         | 45            | 231           |
|            | 34   | AAGGTGAGG   | CTGGTGACA   | 91.62   | 70.33   | 21.29     | -8         | -12    | -7.8   | -4.2        | 108           | 100           |
| COL3A1     | 16   | CCTGTAAGT   | GGATAAGC    | 79.93   | 71.9    | 8.03      | 23         | -8.7   | -6.5   | -2.2        | 99            | 122           |
|            | 20   | CGCGTAAGT   | CTGGTTATT   | 79.58   | 69.1    | 10.48     | 24         | -10.1  | -5.5   | -4.6        | 54            | 78            |
|            | 42   | GATGTGAGT   | CAGGTAGAA   | 81.5    | 70.5    | 11        | 30         | -8.8   | -11.6  | 2.8         | 108           | 138           |
| COL6A1     | 3    | GGGTGAGT    | CAAGTACTT   | 86.21   | 63.35   | 22.86     | -66        | -14.2  | -5.6   | -8.6        | 201           | 135           |
| COL7A1     | 3    | AAGGTGATC   | TCCGTGAGC   | 76.61   | 66.14   | 10.47     | -104       | -9.9   | -6.6   | -3.3        | 160           | 56            |
|            | 73   | AGGGTGAGG   | CTGGTATTC   | 84.11   | 62.3    | 21.81     | -62        | -12    | -6.8   | -5.2        | 201           | 139           |
|            | 95   | GTGGTAGT    | GGGGTCAGT   | 86.21   | 79.75   | 6.46      | -7         | -12.1  | -11.9  | -0.2        | 72            | 65            |
| C3         | 18   | TGGGTAAGG   | GAAGTGAGT   | 83.76   | 81.84   | 1.92      | -61        | -12.2  | -8.8   | -3.4        | 109           | 48            |
| CYP19      | 6    | TGTGTAAGT   | CAGGTA AACT | 75.91   | 86.38   | -10.47    | 87         | -9     | -11.9  | 2.9         | 115           | 202           |
| CYP27A1    | 6    | GCGGTAGGA   | GTGGTGGGT   | 73.29   | 75.91   | -2.62     | -89        | -9.5   | -11.3  | 1.8         | 167           | 78            |
| DMD        | 64   | GCTGTAAGT   | AAAGTAGGT   | 76.78   | 76.96   | -0.18     | 57         | -8.7   | -8.4   | -0.3        | 75            | 132           |
|            | 26   | AAGGTA AAA  | GAGGTTGAT   | 79.93   | 63.17   | 16.76     | 116        | -9.8   | -7.6   | -2.2        | 171           | 287           |
| FAH        | 12   | CCGGTGAGT   | GAGGTGGGT   | 89      | 83.42   | 5.58      | 105        | -12.1  | -13.4  | 1.3         | 102           | 207           |
| FBN1       | 46   | TAGGTGCGT   | GAAGTCAGT   | 81.5    | 75.39   | 6.11      | 33         | -11.8  | -6.5   | -5.3        | 117           | 150           |
| F5         | 10   | CAGGTA TTT  | TCTGTAAGA   | 75.39   | 70.15   | 5.24      | -35        | -11    | -6.5   | -4.5        | 215           | 180           |
| FGA        | 4    | GAGGTA AAGT | AAAGTACAG   | 96.85   | 58.11   | 38.74     | -66        | -14.1  | -3.5   | -10.6       | 146           | 80            |
|            |      | GAGGTA AAGT | AAATGTAAGA  | 96.85   | 71.9    | 24.95     | -36        | -14.1  | -4.3   | -9.8        | 146           | 110           |
|            |      | GAGGTA AAGT | GGAGTTAAG   | 96.85   | 49.73   | 47.12     | -1         | -14.1  | -2.2   | -11.9       | 146           | 145           |
|            |      | GAGGTA AAGT | TAAATATTA   | 96.85   | 72.94   | 23.91     | 4          | -14.1  | -4.5   | -9.6        | 146           | 150           |
| F7         | 7    | TGGGTGGGT   | TGGGTGGGT   | 74.69   | 74.69   | 0         | 37         | -13.7  | -13.7  | 0           | 124           | 161           |
| GCK        | 4    | AAGGTGGGC   | CCTGTGAGG   | 80.1    | 72.42   | 7.68      | -24        | -11.2  | -6.6   | -4.6        | 120           | 96            |
| GHV        | 2    | TTTGTAAAG   | TGGGTA AATG | 70.33   | 69.98   | 0.35      | 12         | -6.5   | -10.1  | 3.6         | 161           | 173           |
| HBA2       | 1    | GAGGTGAGG   | GGGGTA AAG  | 89.35   | 84.99   | 4.36      | -49        | -12    | -11.9  | -0.1        | 132           | 83            |
| HBB        | 1    | CAGGTTGGT   | AAGGTGAAC   | 80.1    | 76.61   | 3.49      | -38        | -14    | -9.9   | -4.1        | 135           | 97            |
|            |      | CAGGTTGGT   | GTGGTGAGG   | 80.1    | 81.84   | -1.74     | -16        | -14    | -9.9   | -4.1        | 135           | 119           |
|            |      | CAGGTTGGT   | AAGGTTACA   | 80.1    | 70.5    | 9.6       | 13         | -14    | -7.6   | -6.4        | 135           | 148           |
|            |      | AGGGTGAGT   | AAGGTGAAG   | 88.48   | 77.83   | 10.65     | -135       | -14.2  | -9.9   | -4.3        | 223           | 88            |
|            | 2    | AGGGTGAGT   | ATGGTTAAG   | 88.48   | 63.87   | 24.61     | 47         | -14.2  | -5.5   | -8.7        | 223           | 270           |
| HEXA       | 9    | GACGTGAGG   | AGGGTGGGT   | 76.43   | 78.18   | -1.75     | 17         | -6.6   | -13.4  | 6.8         | 87            | 104           |
| HEXB       | 8    | TTGGTAAGA   | AAATGTTGGT  | 82.72   | 67.01   | 15.71     | -4         | -9.8   | -6.5   | -3.3        | 181           | 177           |
| HMGCL      | 7    | ACGGTA AAGC | GGGGTATTT   | 85.68   | 64.74   | 20.94     | 78         | -9.8   | -8.9   | -0.9        | 126           | 204           |
| HPRT       | 1    | GTGGTGAGC   | CAGGTGGCG   | 80.62   | 68.58   | 12.04     | 49         | -9.9   | -11.2  | 1.3         | 112           | 161           |
|            | 5    | GAAGTA AAGT | AAGGTA AAGC | 84.99   | 93.54   | -8.55     | 67         | -8.7   | -11.9  | 3.2         | 18            | 85            |
| IDS        | 7    | ATGGTA AAGC | CTGGTGAGT   | 86.03   | 89.35   | -3.32     | 22         | -9.8   | -12.1  | 2.3         | 127           | 149           |
| ITGB2      | 7    | TTGTAAGT    | AGGGTGGGG   | 75.21   | 73.82   | 1.39      | 64         | -8.7   | -11.2  | 2.5         | 156           | 220           |
|            |      | TTGTAAGT    | GAGGTATAG   | 75.21   | 67.88   | 7.33      | 298        | -8.7   | -8.9   | 0.2         | 156           | 454           |
|            |      | GATGTGAGT   | CAGGTGTGG   | 81.5    | 81.67   | -0.17     | 27         | -8.8   | -10.7  | 1.9         | 163           | 190           |
| ITGB5      | 1    | AAGGTGAGC   | AGGTTGAGG   | 90.4    | 84.11   | 6.29      | -66        | -12    | -12    | 0           | 946           | 880           |
| LDLR       | 12   | GAGGTGTGG   | TACGTACGA   | 78.53   | 66.31   | 12.22     | 11         | -8.6   | -4.5   | -4.1        | 140           | 151           |
| LPL        | 2    | ACGGTA AAGG | ATGGTGATC   | 86.91   | 69.1    | 17.81     | -18        | -9.8   | -7.8   | -2          | 161           | 143           |
|            |      | ACGGTA AAGG | GAGGTATCC   | 86.91   | 66.84   | 20.07     | 42         | -9.8   | -8.9   | -0.9        | 161           | 203           |
|            |      | ACGGTA AAGG | CAGGTGGGA   | 86.91   | 81.15   | 5.76      | 142        | -9.8   | -13.3  | 3.5         | 161           | 303           |
|            |      | ACGGTA AAGG | GAGGTGGGT   | 86.91   | 76.96   | 9.95      | 246        | -9.8   | -11.9  | 2.1         | 161           | 407           |
|            |      | ACGGTA AAGG | AGAGTGAGG   | 86.91   | 72.25   | 14.66     | 382        | -9.8   | -6.6   | -3.2        | 161           | 543           |
| MTHFR      | 4    | CAGGTGAGG   | AAGGCATGC   | 92.49   | 65.27   | 27.22     | -57        | -14.1  | -5.4   | -8.7        | 194           | 137           |
| NF1        | 27b  | GAGGTA AAG  | AACGTTAAG   | 91.44   | 58.46   | 32.98     | -69        | -11.9  | -2.2   | -9.7        | 111           | 42            |
|            | 28   | AAAGTA AAGT | AAGGTATTC   | 87.26   | 68.93   | 18.33     | -54        | -8.7   | -8.9   | 0.2         | 433           | 379           |
| NF2        | 7    | CGGGTGTGT   | GATGTACGG   | 78.53   | 69.28   | 9.25      | -28        | -12.2  | -3.5   | -8.7        | 76            | 48            |
|            |      | CGGGTGTGT   | ACGGTGTGA   | 78.53   | 71.9    | 6.63      | -23        | -12.2  | -6.5   | -5.7        | 76            | 53            |
|            |      | GAGGTGAGG   | AAGGTGCTG   | 89.35   | 66.84   | 22.51     | -53        | -12    | -8.6   | -3.4        | 218           | 165           |
|            |      | GAGGTGAGG   | GAGGTGCTG   | 89.35   | 64.57   | 24.78     | -38        | -12    | -8.6   | -3.4        | 218           | 180           |
| PBGD       | 1    | GCGGTGAGT   | CAGGTTGCC   | 85.86   | 60.9    | 24.96     | 67         | -12.1  | -9.7   | -2.4        | 60            | 127           |
|            | 10   | CAGGTAGGG   | CGGGTGGGG   | 85.34   | 74.69   | 10.65     | -9         | -13.7  | -12.6  | -1.1        | 114           | 105           |
| PGK1       | 4    | AAGGTA AAGG | GGGGTGAGG   | 83.42   | 81.84   | 1.58      | 30         | -11.6  | -12    | 0.4         | 145           | 175           |
| PKD1       | 43   | AAGGTGAGG   | CAGGTGGCG   | 91.62   | 68.58   | 23.04     | -66        | -12    | -11.2  | -0.8        | 291           | 225           |
| PTEN       | 4    | GAGGTAGGT   | CAGGTATGA   | 86.56   | 83.76   | 2.8       | 4          | -13.8  | -11    | -2.8        | 44            | 48            |
|            | 7    | AAGGTTTGT   | CATGTA AAG  | 78.7    | 83.42   | -4.72     | 75         | -9.8   | -8.6   | -1.2        | 167           | 242           |
| PYGM       | 14   | ACCGTGAGT   | CAGGTGAAG   | 75.21   | 78.7    | -3.49     | -67        | -8.8   | -12    | 3.2         | 148           | 81            |
| RPGR       | 5    | CTGGTGAGA   | CATGTAATT   | 83.94   | 73.99   | 9.95      | -76        | -9.9   | -6.5   | -3.4        | 159           | 83            |
| SERPINA1   | 2    | AAGGTA AAGG | AGGGTACTC   | 94.76   | 61.25   | 33.51     | -84        | -11.9  | -8.9   | -3          | 650           | 566           |
| TP53       | 5    | ATGGTGAGC   | GAGGTGTGTG  | 82.89   | 58.81   | 24.08     | -46        | -9.9   | -7.6   | -2.3        | 184           | 138           |
|            | 6    | GAGGTCTGG   | CTGGTTTGC   | 72.07   | 66.49   | 5.58      | 5          | -7.6   | -5.5   | -2.1        | 113           | 118           |
| TSC2       | 37   | AAGGTGAGT   | CCGGTGAGG   | 95.98   | 84.64   | 11.34     | -29        | -14.2  | -9.9   | -4.3        | 140           | 111           |
| UGT1A1     | 1    | CAGGTGTGT   | GAGGTGACT   | 86.03   | 80.1    | 5.93      | -141       | -12.9  | -9.9   | -3          | 879           | 738           |
| AVG=       |      |             |             | 82.96   | 72.38   | 11.22     | 10.92      | -10.8  | -8.6   | -2.4        | 200.03        | 201.58        |
| SD=        |      |             |             | 6.31    | 8.53    | 11.78     | 88.93      | 2.0    | 2.9    | 3.9         | 217.44        | 195.18        |
| AVG (Abs)= |      |             |             |         |         |           | 62.58      |        |        |             | 160.22        | 174.21        |
|            |      |             |             |         |         |           |            |        |        |             | 98.88         | 111.56        |
|            |      |             |             |         |         |           |            |        |        |             |               |               |

Table S1: Comparison between Authentic (A) and Cryptic (C) 5'ss.

| Gene     | Exon | Seq A     | Seq M         | S&S (A) | S&S (M) | S&S (A-M) |
|----------|------|-----------|---------------|---------|---------|-----------|
| ABCD1    | 1    | GAGGTGGGG | GAAGTGGGG     | 79.05   | 67.19   | 11.86     |
| APOB     | 24   | AAGGTAAAA | AAGGCAAAA     | 79.93   | 62.47   | 17.46     |
| AR       | 4    | CTGGTAAGG | CTGTTAAGG     | 88.13   | 70.68   | 17.45     |
| ATM      | 45   | CAGGTAAGT | CAGATAACT     | 86.38   | 68.93   | 17.45     |
| BRCA1    | 5    | AAGGTATAT | AGGGTATAT     | 74.52   | 67.01   | 7.51      |
|          | 16   | TTTGTGAGT | TTTGTGAGC     | 72.77   | 67.19   | 5.58      |
| CFTR     | 4    | AAGGTAATA | AAGTTAATA     | 79.93   | 62.47   | 17.46     |
|          | 20   | CAGGTGAGC | CACGTGAGC     | 91.27   | 78.35   | 12.92     |
| COL1A1   | 8    | CCTGTGAGT | CCTATGAGT     | 76.78   | 59.33   | 17.45     |
|          |      | CCTGTGAGT | CCTGTGAAT     | 76.78   | 63      | 13.78     |
|          | 34   | AAGGTGAGG | -             | 91.62   | N/A     | N/A       |
| COL3A1   | 16   | CCTGTAAGT | CCTATAAGT     | 79.93   | 62.47   | 17.46     |
|          | 20   | CGCGTAAGT | CGCATAAGT     | 79.58   | 62.12   | 17.46     |
|          | 42   | GATGTGAGT | GATATGAGT     | 81.5    | 64.04   | 17.46     |
| COL6A1   | 3    | GGGGTGGT  | GGGATGAGT     | 86.21   | 68.76   | 17.45     |
| COL7A1   | 3    | AAGGTGATC | AGGGTGATC     | 76.61   | 69.1    | 7.51      |
|          | 73   | AGGGTGAGG | AGGGTGAGG     | 84.11   | 84.11   | 0         |
|          | 95   | GTGGTGAGT | GTAGTGAGT     | 86.21   | 74.34   | 11.87     |
| C3       | 18   | TGGGTAAGG | TGGATAAGG     | 83.76   | 66.31   | 17.45     |
| CYP19    | 6    | TGTGTAAGT | TGTGCAAGT     | 75.91   | 58.46   | 17.45     |
| CYP27    | 6    | GCGGTAGGA | GAGGTAGGA     | 73.29   | 81.15   | -7.86     |
|          |      | GCGGTAGGA | GCAGTAGGA     | 73.29   | 61.43   | 11.86     |
| DMD      | 64   | GCTGTAAGT | GCTGTAAGT     | 76.78   | 63.17   | 13.61     |
|          | 26   | AAGGTAAAA | AAGGGAAAA     | 79.93   | 62.47   | 17.46     |
| FAH      | 12   | CCGGTGGT  | CCGGTGAAT     | 89      | 75.21   | 13.79     |
| FBN1     | 46   | TAGGTGCGT | TAGATGCGT     | 81.5    | 64.04   | 17.46     |
| F5       | 10   | CAGGTATT  | CATGTATT      | 75.39   | 63.17   | 12.22     |
| FGA      | 4    | GAGGTAAGT | GAGTTAAGT     | 96.85   | 79.4    | 17.45     |
| F7       | 7    | TGGGTGGGT | TGGGTGGAT     | 74.69   | 60.9    | 13.79     |
|          |      | TGGGTGGGT | TGGGTGGGT     | 74.69   | 74.69   | 0         |
|          |      | TGGGTGGGT | TGGGTACCA     | 74.69   | 58.11   | 16.58     |
| GCK      | 4    | AAGGTGGGC | -             | 80.1    | N/A     | N/A       |
| GHV      | 2    | TTTGTAAAG | TTTATAAGC     | 70.33   | 52.87   | 17.46     |
| HBA2     | 1    | GAGGTGAGG | GAGGCTCCC     | 89.35   | 39.61   | 49.74     |
| HBB      | 1    | CAGGTTGGT | CACGTTGGT     | 80.1    | 67.19   | 12.91     |
|          |      | CAGGTTGGT | CAGATTGGT     | 80.1    | 62.65   | 17.45     |
|          |      | CAGGTTGGT | CAGTTGGT      | 80.1    | 62.65   | 17.45     |
|          |      | CAGGTTGGT | CAGGCTGGT     | 80.1    | 62.65   | 17.45     |
|          |      | CAGGTTGGT | CAGGTTGAT     | 80.1    | 66.31   | 13.79     |
|          |      | CAGGTTGGT | CAGGTTGCT     | 80.1    | 66.49   | 13.61     |
|          |      | CAGGTTGGT | CAGGTTGTT     | 80.1    | 66.31   | 13.79     |
|          |      | CAGGTTGGT | CAGGTTGGC     | 80.1    | 74.52   | 5.58      |
|          | 2    | AGGGTGGT  | AGGGTGCT      | 88.48   | 64.04   | 24.44     |
| HEXA     | 9    | GACGTGAGG | GACATGAGG     | 76.43   | 58.98   | 17.45     |
| HEXB     | 8    | TTGGTAAGA | TTGGTAACA     | 82.72   | 69.1    | 13.62     |
| HMGCL    | 7    | ACGGTAAGC | ACGCTAAGC     | 85.68   | 68.23   | 17.45     |
| HPRT     | 1    | GTGGTGAGC | GTGGTGAAC     | 80.62   | 66.84   | 13.78     |
|          |      | GTGGTGAGC | GTGGTGATC     | 80.62   | 66.84   | 13.78     |
|          |      | GTGGTGAGC | -             | 80.62   | N/A     | N/A       |
|          | 5    | GAAGTAAGT | GAAGGAAGT     | 84.99   | 67.53   | 17.46     |
|          |      | GAAGTAAGT | GAAGTGTGT     | 84.99   | 71.02   | 13.97     |
|          |      | GAAGTAAGT | GAAGTAAAT     | 84.99   | 71.2    | 13.79     |
|          |      | GAAGTAAGT | GAATAAGTT     | 84.99   | 26      | 58.99     |
| IDS      | 7    | ATGGTAAGC | ATTTTAAGC     | 86.03   | 56.36   | 29.67     |
| ITGB2    | 7    | TTCGTAAGT | TTCATAAGT     | 75.21   | 57.76   | 17.45     |
| ITGB3    | 4    | GATGTGAGT | GATATGAGT     | 81.5    | 64.04   | 17.46     |
| KRT5     | 1    | AAGGTGAGC | AAGATGAGC     | 90.4    | 72.94   | 17.46     |
| LDLR     | 12   | GAGGTGTGG | GAGGCGTGG     | 78.53   | 61.08   | 17.45     |
| LPL      | 2    | ACGGTAAGG | ACGATAAGG     | 86.91   | 69.45   | 17.46     |
| MTHFR    | 4    | CAGGTGAGG | CAGATGAGG     | 92.49   | 75.04   | 17.45     |
| NF1      | 27b  | GAGGTAAGA | -             | 91.44   | N/A     | N/A       |
|          | 28   | AAAGTAAGT | AAAATAAGT     | 87.26   | 69.8    | 17.46     |
| NF2      | 7    | CGGGTGTGT | -             | 78.53   | N/A     | N/A       |
|          |      | CGGGTGTGT | CGGGTGTAT     | 78.53   | 64.74   | 13.79     |
|          | 12   | GAGGTGAGG | -             | 89.35   | N/A     | N/A       |
|          |      | GAGGTGAGG | GAGATGAGG     | 89.35   | 71.9    | 17.45     |
| PBGD     | 1    | GCGGTGAGT | GCGATGAGT     | 85.86   | 68.41   | 17.45     |
|          |      | GCGGTGAGT | GCGGAGAGT     | 85.86   | 68.41   | 17.45     |
|          |      | GCGGTGAGT | GCGGTGACT     | 85.86   | 72.25   | 13.61     |
|          |      | GCGGTGAGT | GCGGTTAGT     | 85.86   | 79.4    | 6.46      |
|          | 10   | CAGGTAGGG | CATGTAGGG     | 85.34   | 67.88   | 17.46     |
| PGK1     | 4    | AAGGTAGGA | AAGTTAGGA     | 83.42   | 65.96   | 17.46     |
| PKD1     | 43   | AAGGTGAGG | Not specified | 91.62   | N/A     | N/A       |
| PTEN     | 4    | GAGGTAGGT | GAGGCAGGT     | 86.56   | 69.1    | 17.46     |
|          | 7    | AAGGTTTGT | AAGATTGT      | 78.7    | 61.25   | 17.45     |
| PYGM     | 14   | ACCGTGAGT | ACCATGAGT     | 75.21   | 57.76   | 17.45     |
| RPGR     | 5    | CTGGTGAGA | CTGTTGAGA     | 83.94   | 66.49   | 17.45     |
| SERPINA1 | 2    | AAGGTAAGG | AAGTTAAGG     | 94.76   | 77.31   | 17.45     |
| TPS3     | 5    | ATGGTGAGC | ATGGTGACC     | 82.89   | 69.28   | 13.61     |
|          | 6    | GAGGTCTGG | GAAGTCTGG     | 72.07   | 60.2    | 11.87     |
|          |      | GAGGTCTGG | GAGATCTGG     | 72.07   | 54.62   | 17.45     |
| TSC2     | 37   | AAGGTGAGT | AAGGATGAG     | 95.98   | 43.63   | 52.35     |
| UGT1A1   | 1    | CAGGTGTGT | CAGCTGTGT     | 86.03   | 68.58   | 17.45     |
| AVG=     |      |           |               | 82.96   | 65.59   | 16.40     |
| SD=      |      |           |               | 6.31    | 8.71    | 9.20      |

Table S2: Comparison between Authentic (A) and Mutant (M) 5'ss.

| Gene     | Exon | Seq M         | Seq C      | S&S (M) | S&S (C) | S&S (C-M) |
|----------|------|---------------|------------|---------|---------|-----------|
| ABCD1    | 1    | GAAGTGGGG     | CAGGTGGG   | 67.19   | 75.74   | 8.55      |
| APOB     | 24   | AAGGCAAAA     | AAAGTAAAT  | 62.47   | 73.47   | 11.00     |
| AR       | 4    | CTGTAAAGG     | CAGGTGTAG  | 70.68   | 67.88   | -2.80     |
| ATM      | 45   | CAGATAACT     | AGAGTGACT  | 68.93   | 63      | -5.93     |
|          |      | CAGATAACT     | TTGGCTTT   | 68.93   | 53.92   | -15.01    |
| BRCA1    | 5    | AGGGTATAT     | TATGTAAGA  | 67.01   | 78.01   | 11.00     |
|          | 16   | TTTGTGAGC     | TAGGTATTG  | 67.19   | 66.66   | -0.53     |
| CFTR     | 4    | AAGTTAATA     | ATTGTGAGG  | 62.47   | 71.9    | 9.43      |
|          | 20   | CACGTGAGC     | AAGGCAACT  | 78.35   | 68.06   | -10.29    |
| COL1A1   | 8    | CCTATGAGT     | TTGGTAAGA  | 59.33   | 82.72   | 23.39     |
|          |      | CCTATGAGT     | CTGGTGAGC  | 59.33   | 83.76   | 24.43     |
|          |      | CCTGTGAAT     | CTGGTGAGC  | 63      | 82.72   | 19.72     |
|          |      | CCTGTGAAT     | CTGGTGAGC  | 63      | 83.76   | 20.76     |
|          | 34   | -             | CTGGTGACA  | N/A     | 70.33   | N/A       |
| COL3A1   | 16   | CCTATAAGT     | GGAGTAAGC  | 62.47   | 71.9    | 9.43      |
|          | 20   | CGCATAAGT     | CTGGTTATT  | 62.12   | 69.1    | 6.98      |
|          | 42   | GATATGAGT     | CAGGTAGAA  | 64.04   | 70.5    | 6.46      |
| COL6A1   | 3    | GGGATGAGT     | CAAGTACTT  | 68.76   | 63.35   | -5.41     |
| COL7A1   | 3    | AGGGTGATC     | TCCGTGAGC  | 69.1    | 66.14   | -2.96     |
|          | 73   | AGGGTGAAG     | CTGGTATTC  | 84.11   | 62.3    | N/A       |
|          | 95   | GTAGTGAAGT    | GGGTCAGT   | 74.34   | 79.75   | 5.41      |
| C3       | 18   | TGGATAAAGG    | GAAGTGAGT  | 66.31   | 81.84   | 15.53     |
| CYP19    | 6    | TGTGCAAGT     | CAGGTAACCT | 58.46   | 86.38   | 27.92     |
| CYP27    | 6    | GAGGTAGGA     | GTGGTGGGT  | 81.15   | 75.91   | -5.24     |
|          |      | GCAGTAGGA     | GTGGTGGGT  | 61.43   | 75.91   | 14.48     |
| DMD      | 64   | CCTGTAACCT    | AAAGTAGGT  | 63.17   | 76.96   | 13.79     |
|          | 26   | AAGGGAAAA     | GAGGTGTAT  | 62.47   | 63.17   | 0.70      |
| FAH      | 12   | CCGCTGAAT     | GAGGTGGGT  | 75.21   | 83.42   | 8.21      |
| FBN1     | 46   | TAGATCGGT     | GAAGTCAGT  | 64.04   | 75.39   | 11.35     |
| F5       | 10   | CATGTATT      | TCTGTAAGA  | 63.17   | 70.15   | 6.98      |
| FGA      | 4    | GAGTTAAGT     | AAAGTACAG  | 79.4    | 58.11   | -21.29    |
|          |      | GAGTTAAGT     | AATGTTAGA  | 79.4    | 71.9    | -7.50     |
|          |      | GAGTTAAGT     | GGAGTTAAG  | 79.4    | 49.73   | -29.67    |
|          |      | GAGTTAAGT     | TAAGTATTA  | 79.4    | 72.94   | -6.46     |
| F7       | 7    | TGGGTGGAT     | TGGGTGGGT  | 60.9    | 74.69   | 13.79     |
|          |      | TGGGTGGGT     | TGGGTGGGT  | 74.69   | 74.69   | 0.00      |
|          |      | TGGGTACCA     | TGGGTGGGT  | 58.11   | 74.69   | 16.58     |
| GCK      | 4    | -             | CCTGTGAGG  | N/A     | 72.42   | N/A       |
| GHV      | 2    | TTTATAAGC     | TGGTAAATG  | 52.87   | 69.98   | 17.11     |
| HBA2     | 1    | GAGGCTCCC     | GGGTAAGG   | 39.61   | 84.99   | 45.38     |
| HHB      | 1    | CACGTGGT      | AAGGTGAAC  | 67.19   | 76.61   | 9.42      |
|          |      | CACGTGGT      | GTGGTGAGC  | 67.19   | 81.84   | 14.65     |
|          |      | CACGTGGT      | AAGGTTACA  | 67.19   | 70.5    | 3.31      |
|          |      | CAGATGGT      | AAGGTGAAC  | 62.65   | 76.61   | 13.96     |
|          |      | CAGATGGT      | GTGGTGAGG  | 62.65   | 81.84   | 19.19     |
|          |      | CAGATGGT      | AAGGTTACA  | 62.65   | 70.5    | 7.85      |
|          |      | CAGTTGGT      | AAGGTGAAC  | 62.65   | 76.61   | 13.96     |
|          |      | CAGTTGGT      | GTGGTGAGG  | 62.65   | 81.84   | 19.19     |
|          |      | CAGTTGGT      | AAGGTTACA  | 62.65   | 70.5    | 7.85      |
|          |      | CAGGCTGGT     | AAGGTGAAC  | 62.65   | 76.61   | 13.96     |
|          |      | CAGGCTGGT     | GTGGTGAGG  | 62.65   | 81.84   | 19.19     |
|          |      | CAGGCTGGT     | AAGGTTACA  | 62.65   | 70.5    | 7.85      |
|          |      | CAGGTTGAT     | AAGGTGAAC  | 66.31   | 76.61   | 10.30     |
|          |      | CAGGTTGAT     | GTGGTGAGG  | 66.31   | 81.84   | 15.53     |
|          |      | CAGGTTGAT     | AAGGTTACA  | 66.31   | 70.5    | 4.19      |
|          |      | CAGGTTGCT     | AAGGTGAAC  | 66.49   | 76.61   | 10.12     |
|          |      | CAGGTTGCT     | GTGGTGAGG  | 66.49   | 81.84   | 15.35     |
|          |      | CAGGTTGCT     | AAGGTTACA  | 66.49   | 70.5    | 4.01      |
|          |      | CAGGTTGTT     | AAGGTGAAC  | 66.31   | 76.61   | 10.30     |
|          |      | CAGGTTGTT     | GTGGTGAGG  | 66.31   | 81.84   | 15.53     |
|          |      | CAGGTTGTT     | AAGGTTACA  | 66.31   | 70.5    | 4.19      |
|          |      | CAGGTTGGC     | AAGGTGAAC  | 74.52   | 76.61   | 2.09      |
|          |      | CAGGTTGGC     | GTGGTGAGG  | 74.52   | 81.84   | 7.32      |
|          |      | CAGGTTGGC     | AAGGTTACA  | 74.52   | 70.5    | -4.02     |
|          | 2    | AGGGTGTCT     | AAGGTGAAG  | 64.04   | 77.83   | 13.79     |
|          | 9    | AGGGTGTCT     | ATGGTTAAG  | 64.04   | 63.87   | -0.17     |
| HEXA     | 9    | GACATGAGG     | AGGTTGGT   | 58.98   | 78.18   | 19.20     |
| HEXB     | 8    | TTGGTAACA     | AATGTTGTT  | 69.1    | 67.01   | -2.09     |
| HMGCL    | 7    | ACGCTAAGC     | GGGTTATT   | 68.23   | 64.74   | -3.49     |
| HPRT     | 1    | GTGGTGAACT    | CAGGTGGC   | 66.84   | 68.58   | 1.74      |
|          |      | GTGGTGATC     | CAGGTGGC   | 66.84   | 68.58   | 1.74      |
|          |      | -             | CAGGTGGC   | N/A     | 68.58   | N/A       |
|          | 5    | GAAGGAAGT     | AAGGTAAGC  | 67.53   | 93.54   | 26.01     |
|          |      | GAAGTGTT      | AAGGTAAGC  | 71.02   | 93.54   | 22.52     |
|          |      | GAAGTAAAT     | AAGGTAAGC  | 71.2    | 93.54   | 22.34     |
|          |      | GAATAAGTT     | AAGGTAAGC  | 26      | 93.54   | 67.54     |
| IDS      | 7    | ATTTAAGC      | CTGGTGAGT  | 56.36   | 89.35   | 32.99     |
| ITGB2    | 7    | TTCATAAGT     | AGGGTGGG   | 57.76   | 73.82   | 16.06     |
|          |      | TTCATAAGT     | GAGGTATAG  | 57.76   | 67.88   | 10.12     |
| ITGB3    | 4    | GATATGAGT     | CAGGTGGG   | 64.04   | 81.67   | 17.63     |
| KRT5     | 1    | AAGATGAGC     | AGGGTGAGG  | 72.94   | 84.11   | 11.17     |
| LDLR     | 12   | GAGGCTGGG     | TACGTACGA  | 61.08   | 66.31   | 5.23      |
| LPL      | 2    | ACGATAAGG     | ATGGTATC   | 69.45   | 69.1    | -0.35     |
|          |      | ACGATAAAG     | GAGGTATCC  | 69.45   | 66.84   | -2.61     |
|          |      | ACGATAAAG     | CAGGTGGGA  | 69.45   | 81.15   | 11.70     |
|          |      | ACGATAAAG     | GAGGTTGGT  | 69.45   | 76.96   | 7.51      |
|          |      | ACGATAAAG     | AGAGTGAGG  | 69.45   | 72.25   | 2.80      |
| MTHFR    | 4    | CAGATGAGG     | AAGGCATGC  | 75.04   | 65.27   | -9.77     |
| NF1      | 27b  | -             | AACGTTAAG  | N/A     | 58.46   | N/A       |
|          | 28   | AAAATAAGT     | AAGGTATTC  | 69.8    | 68.93   | -0.87     |
| NF2      | 7    | -             | GATGACGG   | N/A     | 69.28   | N/A       |
|          |      | -             | ACGGTGTGA  | N/A     | 71.9    | N/A       |
|          |      | CGGGTGTAT     | GATGACGG   | 64.74   | 69.28   | 4.54      |
|          |      | CGGGTGTAT     | ACGGTGTGA  | 64.74   | 71.9    | 7.16      |
|          | 12   | -             | AAGGTGCTG  | N/A     | 66.84   | N/A       |
|          |      | GAGATGAGG     | GAGGTGCTG  | N/A     | 64.57   | N/A       |
|          |      | GAGATGAGG     | AAGGTGCTG  | 71.9    | 66.84   | -5.06     |
|          |      | GAGATGAGG     | GAGGTGCTG  | 71.9    | 64.57   | -7.33     |
| PBGD     | 1    | CCGATGAGT     | CAGGTTGCC  | 68.41   | 60.9    | -7.51     |
|          |      | CCGGAGAGT     | CAGGTTGCC  | 68.41   | 60.9    | -7.51     |
|          |      | CCGGTGGT      | CAGGTTGCC  | 72.25   | 60.9    | -11.35    |
|          |      | CCGGTGGT      | CAGGTTGCC  | 79.4    | 60.9    | -18.50    |
|          | 10   | CATGTAGGG     | CGGGTGGG   | 67.88   | 74.69   | 6.81      |
| PKKI     | 4    | AAGTTAGGA     | GGGGTGAGG  | 65.96   | 81.84   | 15.88     |
| PKDI     | 43   | Not specified | CAGGTGGC   | N/A     | 68.58   | N/A       |
| PTEN     | 4    | GAGGCAGGT     | CAGGTATGA  | 69.1    | 83.76   | 14.66     |
|          | 7    | AAGATTGT      | CATGTAAGG  | 61.25   | 83.42   | 22.17     |
| PYGM     | 14   | ACCATGAGT     | CAGGTGAAG  | 57.76   | 78.7    | 20.94     |
| RPGR     | 5    | CTGTTAGGA     | CATGTAAT   | 66.49   | 73.99   | 7.50      |
| SERPINA1 | 2    | AAGTTAAGG     | AGGTAACCT  | 77.31   | 61.25   | -16.06    |
| TP53     | 5    | ATGGTACG      | GAGGTGTG   | 69.28   | 58.81   | -10.47    |
|          | 6    | GAAGTCTGG     | CTGGTTGC   | 60.2    | 66.49   | 6.29      |
|          |      | GAGATCTGG     | CTGGTTGC   | 54.62   | 66.49   | 11.87     |
| TSC2     | 37   | AAGGATGAG     | CCGGTGAGG  | 43.63   | 84.64   | 41.01     |
| UGT1A1   | 1    | CACGCTGTG     | GAGGTGACT  | 68.58   | 80.1    | 11.52     |
| AVG=     |      |               |            | 65.59   | 72.38   | 7.98      |
| SD=      |      |               |            | 8.71    | 8.53    | 13.60     |

Table S3: Comparison between Mutant (M) and Cryptic (C) 5'ss.

| Gene     | Exon | Seq A     | S&S (A) | Seq P1    | S&S (P1) | Dist (A-P1) | Seq P2     | S&S (P2)  | Dist (A-P2) | S&S (A-P1) | S&S (A-P2) |
|----------|------|-----------|---------|-----------|----------|-------------|------------|-----------|-------------|------------|------------|
| ABCD1    | 1    | GAGGTGGGG | 79.05   |           |          |             |            |           |             |            |            |
| APOB     | 24   | AAGGTAATA | 79.93   |           |          |             |            |           |             |            |            |
| AR       | 4    | CTGGTAAGG | 88.13   | GAAGTGGGA | 66.14    | 15          | CAAGTGGGCC | 69.11     | -20         | 21.99      | 19.02      |
| ATM      | 45   | CAGGTAAGT | 86.38   | TGAGTGAGT | 73.12    | 48          | GAAGTAGGT  | 74.69     | -37         | 13.26      | 11.69      |
| BRCA1    | 5    | AAGGTATAT | 74.52   | TTGGTAATG | 69.98    | 12          |            |           |             | 4.54       |            |
|          | 16   | TTGTGAGT  | 72.77   | TATGTAGGT | 73.12    | 65          | AGGGTCAAC  | 62.65     | -51         | -0.35      | 10.12      |
| CFTR     | 4    | AAGTAATA  | 79.93   | TAGGTAGTG | 67.19    | 81          |            |           |             | 12.74      |            |
|          | 20   | CAGGTGAGC | 91.27   |           |          |             |            |           |             |            |            |
| COL1A1   | 8    | CCTGTGAGT | 76.78   |           |          |             |            |           |             |            |            |
|          | 34   | AAGGTGAGG | 91.62   |           |          |             |            |           |             |            |            |
| COL3A1   | 16   | CCTGTAAGT | 79.93   |           |          |             |            |           |             |            |            |
|          | 20   | CGCGTAAGT | 79.58   | GTGGTGAAC | 66.84    | -8          |            |           |             | 12.74      |            |
|          | 42   | GATGTGAGT | 81.5    | CTGGTGAAC | 69.98    | -17         | CTGGTACAG  | 63.35     | -26         | 11.52      | 18.15      |
| COL6A1   | 3    | GGGGTGAGT | 86.21   | GGGGTTGGC | 63.87    | 63          | CTCGTGGGG  | 61.78     | -5          | 22.34      | 24.43      |
| COL7A1   | 3    | AAGGTGATC | 76.61   |           |          |             |            |           |             |            |            |
|          | 73   | AGGGTGAGG | 84.11   | AGAGTGAGG | 72.25    | 25          | GGGGTGTGG  | 71.02     | -32         | 11.86      | 13.09      |
|          | 95   | GTGGTGAGT | 86.21   |           |          |             |            |           |             |            |            |
| C3       | 18   | TGGGTAAGG | 83.76   | AGAGTCAGA | 64.74    | 37          | CCGGTACAA  | 61.95     | 20          | 19.02      | 21.81      |
| CYP19    | 6    | TGTGTAAGT | 75.91   | AAAGTATGA | 71.02    | -15         | TAAGTAATA  | 64.57     | 4           | 4.89       | 11.34      |
| CYP27A1  | 6    | GCGGTAGGA | 73.29   | CAGGTGGGC | 80.97    | 81          | TGGGTGTGG  | 69.8      | -85         | -7.68      | 3.49       |
| DMD      | 64   | GCTGTAAGT | 76.78   |           |          |             |            |           |             |            |            |
|          | 26   | AAGGTAATA | 79.93   | TAAGTAATA | 64.57    | 25          |            |           |             | 15.36      |            |
| FAH      | 12   | CCGGTGAGT | 89      |           |          |             |            |           |             |            |            |
| FBN1     | 46   | TAGGTGCGT | 81.5    |           |          |             |            |           |             |            |            |
| F5       | 10   | CAGGTATT  | 75.39   | GAAGTAACC | 65.79    | 16          |            |           |             | 9.6        |            |
| FGA      | 4    | GAGGTAAGT | 96.85   |           |          |             |            |           |             |            |            |
| F7       | 7    | TGGTGGGT  | 74.69   |           |          |             |            |           |             |            |            |
| GCK      | 4    | AAGGTGGGC | 80.1    |           |          |             |            |           |             |            |            |
| GHV      | 2    | TTTGAAGC  | 70.33   |           |          |             |            |           |             |            |            |
| HBA2     | 1    | GAGGTGAGG | 89.35   | ATGGTCCGG | 73.12    | -19         | AAGGTCCGG  | 73.63     | -44         | 16.23      | 15.72      |
| HBB      | 1    | CAGGTGGT  | 80.1    |           |          |             |            |           |             |            |            |
|          | 2    | AGGGTGAGT | 88.48   |           |          |             |            |           |             |            |            |
| HEXA     | 9    | GAGGTGAGG | 76.43   |           |          |             |            |           |             |            |            |
| HEXB     | 8    | TTGGTAAGA | 82.72   |           |          |             |            |           |             |            |            |
| HMGCL    | 7    | ACGGTAAGC | 85.68   | CTGGTGGCG | 61.08    | 20          |            |           |             | 24.6       |            |
| HPRT     | 1    | GTGGTGAGC | 80.62   |           |          |             |            |           |             |            |            |
|          | 5    | GAAGTAAGT | 84.99   |           |          |             |            |           |             |            |            |
| IDS      | 7    | ATGGTAAGC | 86.03   |           |          |             |            |           |             |            |            |
| ITGB2    | 7    | TTCGTAAGT | 75.21   |           |          |             |            |           |             |            |            |
| ITGB3    | 4    | GATGTGAGT | 81.5    |           |          |             |            |           |             |            |            |
| KRT5     | 1    | AAGGTGAGC | 90.4    | ACTGTGGGT | 65.61    | 30          | TGGGTCTGA  | 62.3      | 34          | 24.79      | 28.1       |
| LDLR     | 12   | GAGGTGTGG | 78.53   |           |          |             |            |           |             |            |            |
| LPL      | 2    | ACGGTAAGG | 86.91   |           |          |             |            |           |             |            |            |
| MTHFR    | 4    | CAGGTGAGG | 92.49   |           |          |             |            |           |             |            |            |
| NF1      | 27b  | GAGGTAAGA | 91.44   |           |          |             |            |           |             |            |            |
|          | 28   | AAAGTAAGT | 87.26   |           |          |             |            |           |             |            |            |
| NF2      | 7    | CGGGTGTGT | 78.53   |           |          |             |            |           |             |            |            |
|          | 12   | GAGGTGAGG | 89.35   | GGAGTCAGA | 62.47    | -12         |            |           |             | 26.88      |            |
| PBGD     | 1    | GCGGTGAGT | 85.86   | CCGGTGACC | 69.8     | 15          | TTGGTAACG  | 70.15     | -26         | 16.06      | 15.71      |
|          | 10   | CAGGTAGGG | 85.34   |           |          |             |            |           |             |            |            |
| PGK1     | 4    | AAGGTAGGA | 83.42   | CCTGTGATT | 63       | 9           |            |           |             | 20.42      |            |
| PKD1     | 43   | AAGGTGAGG | 91.62   | CCGGTGGGC | 73.12    | 15          |            |           |             | 18.5       |            |
| PTEN     | 4    | GAGGTAGGT | 86.56   |           |          |             |            |           |             |            |            |
|          | 7    | AAGGTTTGT | 78.7    | GTGGTGATA | 67.01    | -50         | CCTGTGTGT  | 65.96     | -57         | 11.69      | 12.74      |
| PYGM     | 14   | ACCGTGAGT | 75.21   |           |          |             |            |           |             |            |            |
| RPGR     | 5    | CTGGTGAGA | 83.94   |           |          |             |            |           |             |            |            |
| SERPINA1 | 2    | AAGGTAAGG | 94.76   | CTGGTGAAT | 75.56    | -22         | AAGGTTGCT  | 65.61     | 5           | 19.2       | 29.15      |
| TP53     | 5    | ATGGTGAGC | 82.89   | GTTGTGAGG | 69.63    | -43         |            |           |             | 13.26      |            |
|          | 6    | GAGGTCTGG | 72.07   |           |          |             |            |           |             |            |            |
| TSC2     | 37   | AAGGTGAGT | 95.98   | TGAGTGAGG | 68.76    | 4           | TCAGTGAGG  | 68.41     | 18          | 27.22      | 27.57      |
| UGT1A1   | 1    | CAGGTGTGT | 86.03   | GAAGTGAAT | 68.23    | -92         |            |           |             | 17.8       |            |
| AVG=     |      |           | 82.96   | AVG (P)=  | 68.10    |             |            | AVG (P)=  | 15.87       |            |            |
| SD=      |      |           | 6.26    | SD (P)=   | 4.49     |             |            | SD (A-P)= | 8.00        |            |            |

**Table S4: Comparison between Authentic (A) and Pseudo (P) 5'ss.**

| Gene     | Exon | Seq C     | S&S (C) | Dist (A-C) | Seq P1    | S&S (P1) | Dist (A-P1) | Seq P2    | S&S (P2)   | Dist (A-P2) | S&S (C-P1) | S&S (C-P2) |
|----------|------|-----------|---------|------------|-----------|----------|-------------|-----------|------------|-------------|------------|------------|
| ABCD1    | 1    | CAGGTGGG  | 75.74   | 9          |           |          |             |           |            |             |            |            |
| APOB     | 24   | AAAGTAAAT | 73.47   | 40         |           |          |             |           |            |             |            |            |
| AR       | 4    | CAGGTAG   | 67.88   | -123       | GAAGTGGGA | 66.14    | 15          | CAAGTGGCC | 69.11      | -20         | 1.74       | -1.23      |
| ATM      | 45   | AGAGTGACT | 63      | 71         | TGAGTGAGT | 73.12    | 48          | GAAGTAGGT | 74.69      | -37         | -10.12     | -11.69     |
|          |      | TTGGTCTT  | 53.92   | 79         |           |          |             |           |            |             |            |            |
| BRCA1    | 5    | TATGTAAGA | 78.01   | -22        | TTGGTAATG | 69.98    | 12          |           |            |             | 8.03       |            |
|          | 16   | TAGGTATG  | 66.66   | 69         | TATGTAGGT | 73.12    | 65          | AGGGTCAAC | 62.65      | -51         | -6.46      | 4.01       |
| CFTR     | 4    | ATTGTGAGG | 71.9    | -93        | TAGGTAGTG | 67.19    | 81          |           |            |             | 4.71       |            |
|          | 20   | AAGCAACT  | 68.06   | 29         |           |          |             |           |            |             |            |            |
| COL1A1   | 8    | TTGGTAAGA | 82.72   | 96         |           |          |             |           |            |             |            |            |
|          |      | CTGGTGAGC | 83.76   | 186        |           |          |             |           |            |             |            |            |
|          | 34   | CTGGTGACA | 70.33   | -8         |           |          |             |           |            |             |            |            |
| COL3A1   | 16   | GGAGTAAGC | 71.9    | 23         |           |          |             |           |            |             |            |            |
|          | 20   | CTGGTATT  | 69.1    | 24         | GTGGTGAAC | 66.84    | -8          |           |            |             | 2.26       |            |
|          | 42   | CAGGTAGAA | 70.5    | 30         | CTGGTGAAC | 69.98    | -17         | CTGGTACAG | 63.35      | -26         | 0.52       | 7.15       |
| COL6A1   | 3    | CAAGTACTT | 63.35   | -66        | GGGGTTGCC | 63.87    | 63          | CTCGTGGG  | 61.78      | -5          | -0.52      | 1.57       |
| COL7A1   | 3    | TCCGTGAGC | 66.14   | -104       |           |          |             |           |            |             |            |            |
|          | 73   | CTGGTATTC | 62.3    | -62        | AGAGTGAGG | 72.25    | 25          | GGGGTGTGG | 71.02      | -32         | -9.95      | -8.72      |
|          | 95   | GGGGTCAGT | 79.75   | -7         |           |          |             |           |            |             |            |            |
| C3       | 18   | GAAGTGAGT | 81.84   | -61        | AGAGTCAGA | 64.74    | 37          | CCGGTACAA | 61.95      | 20          | 17.1       | 19.89      |
| CYP19    | 6    | CAGGTAAC  | 86.38   | 87         | AAAGTATGA | 71.02    | -15         | TAAGTAATA | 64.57      | 4           | 15.36      | 21.81      |
| CYP27A1  | 6    | GTGGTGGG  | 75.91   | -89        | CAGGTGGC  | 80.97    | 81          | TGGGTGTGG | 69.8       | -85         | -5.06      | 6.11       |
| DMD      | 64   | AAAGTAGT  | 76.96   | 57         |           |          |             |           |            |             |            |            |
|          | 26   | GAGGTGAT  | 63.17   | 116        | TAAGTAAAA | 64.57    | 25          |           |            |             | -1.4       |            |
| FAH      | 12   | GAGGTGGT  | 83.42   | 105        |           |          |             |           |            |             |            |            |
| FBN1     | 46   | GAAGTCAGT | 75.39   | 33         |           |          |             |           |            |             |            |            |
| F5       | 10   | TCGTAAAG  | 70.15   | -35        | GAAGTAACC | 65.79    | 16          |           |            |             | 4.36       |            |
| FGA      | 4    | AAAGTACAG | 58.11   | -66        |           |          |             |           |            |             |            |            |
|          |      | AATGTTAGA | 71.9    | -36        |           |          |             |           |            |             |            |            |
|          |      | GGAGTTAAG | 49.73   | -1         |           |          |             |           |            |             |            |            |
|          |      | TAAGTATTA | 72.94   | 4          |           |          |             |           |            |             |            |            |
| F7       | 7    | TGGGTGGG  | 74.69   | 37         |           |          |             |           |            |             |            |            |
| GCK      | 4    | CCTGTGAGG | 72.42   | -24        |           |          |             |           |            |             |            |            |
| GHV      | 2    | TGGGTAATG | 69.98   | 12         |           |          |             |           |            |             |            |            |
| HBA2     | 1    | GGGTAAGG  | 84.99   | -49        | ATGTGCGG  | 73.12    | -19         | AAGTCGGC  | 73.63      | -44         | 11.87      | 11.36      |
| HBB      | 1    | AAGGTGAAC | 76.61   | -38        |           |          |             |           |            |             |            |            |
|          |      | GTGGTGAGG | 81.84   | -16        |           |          |             |           |            |             |            |            |
|          |      | AAGTTACA  | 70.5    | 13         |           |          |             |           |            |             |            |            |
|          | 2    | AAGGTGAAG | 77.83   | -135       |           |          |             |           |            |             |            |            |
|          |      | ATGGTAAAG | 63.87   | 47         |           |          |             |           |            |             |            |            |
| HEXA     | 9    | AGGGTGGG  | 78.18   | 17         |           |          |             |           |            |             |            |            |
| HEXB     | 8    | AATGTTGGT | 67.01   | -4         |           |          |             |           |            |             |            |            |
| HMGCL    | 7    | GGGGTATT  | 64.74   | 78         | CTGGTGGC  | 61.08    | 20          |           |            |             | 3.66       |            |
| HPRT     | 1    | CAGGTGGC  | 68.58   | 49         |           |          |             |           |            |             |            |            |
|          | 5    | AAGTAAGC  | 93.54   | 67         |           |          |             |           |            |             |            |            |
| IDS      | 7    | CTGGTGAGT | 89.35   | 22         |           |          |             |           |            |             |            |            |
| ITGB2    | 7    | AGGGTGGG  | 73.82   | 64         |           |          |             |           |            |             |            |            |
|          |      | GAGGTATAG | 67.88   | 298        |           |          |             |           |            |             |            |            |
| ITGB3    | 4    | CAGGTGGG  | 81.67   | 27         |           |          |             |           |            |             |            |            |
| KRT5     | 1    | AGGGTGAGG | 84.11   | -66        | ACTGTGGG  | 65.61    | 30          | TGGGTCTGA | 62.3       | 34          | 18.5       | 21.81      |
| LDLR     | 12   | TACGTACGA | 66.31   | 11         |           |          |             |           |            |             |            |            |
| LPL      | 2    | ATGGTGATC | 69.1    | -18        |           |          |             |           |            |             |            |            |
|          |      | GAGGTATCC | 66.84   | 42         |           |          |             |           |            |             |            |            |
|          |      | CAGGTGGGA | 81.15   | 142        |           |          |             |           |            |             |            |            |
|          |      | GAGGTGGT  | 76.96   | 246        |           |          |             |           |            |             |            |            |
|          |      | AGAGTGAGG | 72.25   | 382        |           |          |             |           |            |             |            |            |
| MTHFR    | 4    | AAGGCATGC | 65.27   | -57        |           |          |             |           |            |             |            |            |
| NF1      | 27b  | AACGTTAAG | 58.46   | -69        |           |          |             |           |            |             |            |            |
|          | 28   | AAGGTATTC | 68.93   | -54        |           |          |             |           |            |             |            |            |
| NF2      | 7    | GATGTACGG | 69.28   | -28        |           |          |             |           |            |             |            |            |
|          |      | ACGGTGTGA | 71.9    | -23        |           |          |             |           |            |             |            |            |
|          | 12   | AAGGTGCTG | 66.84   | -53        | GGAGTCAGA | 62.47    | -12         |           |            |             | 4.37       |            |
|          |      | GAGGTGCTG | 64.57   | -38        |           |          |             |           |            |             |            |            |
| PBGD     | 1    | CAGGTGGC  | 60.9    | 67         | CCGGTGACC | 69.8     | 15          | TTGGTAACG | 70.15      | -26         | -8.9       | -9.25      |
|          | 10   | CGGGTGGG  | 74.69   | -9         |           |          |             |           |            |             |            |            |
| PGK1     | 4    | GGGGTGAGG | 81.84   | 30         | CCTGTGATT | 63       | 9           |           |            |             | 18.84      |            |
| PKD1     | 43   | CAGGTGGC  | 68.58   | -66        | CCGGTGGC  | 73.12    | 15          |           |            |             | -4.54      |            |
| PTEN     | 4    | CAGGTATGA | 83.76   | 4          |           |          |             |           |            |             |            |            |
|          | 7    | CATGTAAGG | 83.42   | 75         | GTGGTGATA | 67.01    | -50         | CCTGTGTGT | 65.96      | -57         | 16.41      | 17.46      |
| PYGM     | 14   | CAGGTGAAG | 78.7    | -67        |           |          |             |           |            |             |            |            |
| RPGR     | 5    | CATGTAAT  | 73.99   | -76        |           |          |             |           |            |             |            |            |
| SERPINA1 | 2    | AGGGTACTC | 61.25   | -84        | CTGGTGAAT | 75.56    | -22         | AAGGTGCT  | 65.61      | 5           | -14.31     | -4.36      |
| TP53     | 5    | GAGGTGTG  | 58.81   | -46        | GTTGTGAGG | 69.63    | -43         |           |            |             | -10.82     |            |
|          | 6    | CTGGTTGC  | 66.49   | 5          |           |          |             |           |            |             |            |            |
| TSC2     | 37   | CCGGTGAGG | 84.64   | -29        | TGAGTGAGG | 68.76    | 4           | TCAGTGAGG | 68.41      | 18          | 15.88      | 16.23      |
| UGT1A1   | 1    | GAGGTGACT | 80.1    | -141       | GAAGTGACT | 68.23    | -92         |           |            |             | 11.87      |            |
| AVG=     |      |           | 72.38   |            | AVG (P)=  | 68.1     |             |           | AVG (C-P)= | 4.28        |            |            |
| SD=      |      |           | 8.53    |            | SD (P)=   | 4.49     |             |           | SD (C-P)=  | 10.71       |            |            |

**Table S5: Comparison between Cryptic (C) and Pseudo (P) 5'ss.**

| GENE    | EXON               | SEQUENCE  | S&S   | Splice Id |
|---------|--------------------|-----------|-------|-----------|
| ACRBP   | exon 2 (alt 5'ss)  | ATGGTGAGG | 84.11 | 239966    |
|         | exon 2 (alt 5'ss)  | AAGGTGAGG | 91.62 | 239967    |
| AD-017  | exon 1 (alt 5'ss)  | GGGGTATCT | 64.92 | 34024     |
|         | exon 1 (alt 5'ss)  | AGTGTAAAG | 75.04 | 34027     |
| AGR2    | exon 1 (alt 5'ss)  | CAGGTGGGT | 86.56 | 123603    |
|         | exon 1 (alt 5'ss)  | CAGGTAAGG | 95.63 | 123605    |
| ALDOA   | exon 67 (alt 5'ss) | CCGGTAGT  | 89    | 186955    |
|         | exon 67 (alt 5'ss) | CAGGTGGG  | 80.97 | 186956    |
| ANAPC11 | exon 1 (alt 5'ss)  | CGGTAGGG  | 64.92 | 70274     |
|         | exon 1 (alt 5'ss)  | AAGGTCCGA | 75.58 | 70277     |
|         | exon 1 (alt 5'ss)  | CGGTGGT   | 72.6  | 70279     |
| APEX    | exon 1 (alt 5'ss)  | TGAGTCAAG | 62.3  | 144152    |
|         | exon 1 (alt 5'ss)  | AGGGTACA  | 61.43 | 144155    |
| APR-1   | exon 1 (alt 5'ss)  | GAGGTACAG | 67.71 | 204889    |
|         | exon 1 (alt 5'ss)  | CAGTCTCTG | 61.25 | 204891    |
| ATP5G1  | exon 1 (alt 5'ss)  | GAGGTAGT  | 93.71 | 130278    |
|         | exon 1 (alt 5'ss)  | CAGGTGACT | 83.24 | 130280    |
| BAT1    | exon 3 (alt 5'ss)  | TAGGTAAGC | 90.05 | 217192    |
|         | exon 3 (alt 5'ss)  | TTGGTCGC  | 61.95 | 217194    |
|         | exon 3 (alt 5'ss)  | ITGGTATT  | 63.52 | 217195    |
| BAT3    | exon 1 (alt 5'ss)  | CAGGTTTGG | 75.21 | 44300     |
|         | exon 1 (alt 5'ss)  | ACGGTGAAG | 70.68 | 44301     |
| BCAT2   | exon 1 (alt 5'ss)  | CAGGTGGGT | 86.56 | 115901    |
|         | exon 1 (alt 5'ss)  | GGGGTAAGC | 81.84 | 115907    |
| BCL2L1  | exon 1 (alt 5'ss)  | CAGGTAGCC | 84.11 | 22668     |
|         | exon 1 (alt 5'ss)  | CAGGTAGGA | 91.44 | 22671     |
|         | exon 2 (alt 5'ss)  | AATGTAGGT | 76.61 | 22672     |
| BTF3    | exon 2 (alt 5'ss)  | CTGGTACTT | 67.88 | 22674     |
|         | exon 3 (alt 5'ss)  | CAGGTAGTA | 71.55 | 22675     |
|         | exon 3 (alt 5'ss)  | TGGGTAAGG | 82.72 | 22676     |
| CES2    | exon 1 (alt 5'ss)  | AAGGTACA  | 68.93 | 120005    |
|         | exon 1 (alt 5'ss)  | CAGGTACCC | 71.02 | 120024    |
| CES2    | exon 10 (alt 5'ss) | ATGGTGATG | 70.33 | 35788     |
|         | exon 10 (alt 5'ss) | ACAGTAGT  | 76.26 | 35789     |
| CD63    | exon 2 (alt 5'ss)  | GAGGTATAG | 67.88 | 165404    |
|         | exon 2 (alt 5'ss)  | CAGGTGAGG | 92.49 | 165405    |
| CDKN3   | exon 2 (alt 5'ss)  | CAAGTAGT  | 84.99 | 126505    |
|         | exon 2 (alt 5'ss)  | ATGGTAGT  | 80.8  | 126508    |
| CNO7    | exon 1 (alt 5'ss)  | CAAGTAGAT | 84.04 | 58780     |
|         | exon 1 (alt 5'ss)  | TGGGTAAGT | 74.52 | 58782     |
| COL5A7  | exon 1 (alt 5'ss)  | CAGGTACCG | 71.72 | 224730    |
|         | exon 1 (alt 5'ss)  | AGGGTACGA | 75.21 | 224731    |
|         | exon 1 (alt 5'ss)  | CGTGTAAAG | 74.69 | 224732    |
| CPNE1   | exon 1 (alt 5'ss)  | GGGTAATT  | 75.56 | 89619     |
|         | exon 1 (alt 5'ss)  | CCGGTAAGA | 86.73 | 89622     |
| CREM    | (alt 5'ss)         | TAGGTAAGT | 95.63 | 3266      |
|         | (alt 5'ss)         | ACAGTAGT  | 68.58 | 3267      |
|         | (alt 5'ss)         | CAGGTAAGA | 94.58 | 3271      |
|         | (alt 5'ss)         | GTGGTAAGG | 83.94 | 3272      |
|         | (alt 5'ss)         | CTGGTGAAG | 83.94 | 3274      |
| DEDD    | exon 7 (alt 5'ss)  | GTGGTGAGG | 81.84 | 82843     |
|         | exon 7 (alt 5'ss)  | TCAGTGTGA | 56.54 | 82844     |
|         | exon 1 (alt 5'ss)  | GGGGTAGAT | 86.21 | 149572    |
| DJ-1    | exon 1 (alt 5'ss)  | CAGGTACGC | 84.81 | 154064    |
|         | exon 1 (alt 5'ss)  | AGTGTACGA | 63    | 204243    |
| DPH2L2  | exon 1 (alt 5'ss)  | CGAGTGAGG | 73.12 | 16323     |
|         | exon 12 (alt 5'ss) | AGTGTGGT  | 59.51 | 158020    |
| E4F1    | exon 2 (alt 5'ss)  | GGGGTGGT  | 83.42 | 158021    |
|         | exon 2 (alt 5'ss)  | GGGGTGAAG | 81.84 | 30342     |
| FTS     | exon 2 (alt 5'ss)  | TGGGTACGC | 71.55 | 30443     |
|         | exon 7 (alt 5'ss)  | TGGGTAAGG | 83.76 | 28673     |
| GAS5    | exon 7 (alt 5'ss)  | AAGGTACAT | 74.34 | 29696     |
|         | exon 1 (alt 5'ss)  | GTGGTAAG  | 71.2  | 231572    |
| GMPPA   | exon 1 (alt 5'ss)  | GGGTTAGT  | 87.26 | 231576    |
|         | exon 1 (alt 5'ss)  | CAGGTAAGG | 95.63 | 105277    |
| GRB7    | exon 1 (alt 5'ss)  | CAGGTAAGA | 94.58 | 125279    |
|         | (alt 5'ss)         | GCTGTGGTG | 45.2  | 148872    |
| HLA-B   | (alt 5'ss)         | GTGGTGCC  | 81.6  | 148874    |
|         | (alt 5'ss)         | GGGGTAAGG | 84.99 | 148906    |
|         | exon 37 (alt 5'ss) | CCGGTAGT  | 89    | 105813    |
| HMGY    | exon 37 (alt 5'ss) | CAGGTGGT  | 86.56 | 105823    |
|         | exon 1 (alt 5'ss)  | AAGGTGGG  | 81.32 | 209525    |
|         | exon 1 (alt 5'ss)  | CAGGTACCA | 70.66 | 209526    |
| HNRPF   | exon 1 (alt 5'ss)  | CAGGTACCA | 70.66 | 209526    |
|         | exon 1 (alt 5'ss)  | GAAGTATGT | 74.17 | 37732     |
| HNRPH3  | exon 3 (alt 5'ss)  | GAAGTATGT | 74.17 | 37732     |
|         | exon 3 (alt 5'ss)  | GTGGTATGT | 78.53 | 37735     |
| HNRPK   | exon 1 (alt 5'ss)  | GCGGTGAGG | 81.5  | 105456    |
|         | exon 1 (alt 5'ss)  | GAGGTGAGG | 89.35 | 105458    |

| GENE     | EXON               | SEQUENCE  | S&S   | Splice Id |
|----------|--------------------|-----------|-------|-----------|
| HSPC028  | exon 1 (alt 5'ss)  | CAGGTGAGA | 91.44 | 218579    |
|          | exon 1 (alt 5'ss)  | CAGGTGAGG | 92.49 | 218580    |
| HSPC126  | exon 1 (alt 5'ss)  | GTGGTGAAG | 80.8  | 72724     |
|          | exon 1 (alt 5'ss)  | TAGGTAATG | 77.48 | 72726     |
| HSPC142  | exon 1 (alt 5'ss)  | ACGGTGAGC | 82.54 | 212339    |
|          | exon 1 (alt 5'ss)  | AAGGTGGGT | 85.68 | 212342    |
| HSPC171  | exon 4 (alt 5'ss)  | ACAGTAGT  | 76.61 | 37476     |
|          | exon 4 (alt 5'ss)  | CAGGTGAGC | 91.27 | 37477     |
| HSPC274  | exon 1 (alt 5'ss)  | CCGGTAAGC | 87.78 | 22595     |
|          | exon 1 (alt 5'ss)  | CCGGTAGGA | 76.78 | 22599     |
|          | exon 1 (alt 5'ss)  | AACGTATGT | 75.39 | 22602     |
| IRF3     | exon 1 (alt 5'ss)  | GGGTGGGT  | 75.91 | 139017    |
|          | exon 1 (alt 5'ss)  | TAGGTAAGC | 77.66 | 139022    |
| ITGB4    | (alt 5'ss)         | AACGTAGG  | 81.84 | 126342    |
|          | (alt 5'ss)         | TGGGTATGA | 71.9  | 126343    |
| KIAA0436 | exon 1 (alt 5'ss)  | TGGTAAAT  | 88.13 | 251140    |
|          | exon 1 (alt 5'ss)  | TGGTAAAT  | 64.39 | 251143    |
| KIAA0852 | exon 20 (alt 5'ss) | AAGGTGAGC | 68.84 | 150109    |
|          | exon 20 (alt 5'ss) | GAGGTGAGC | 88.13 | 150109    |
| KIAA1118 | exon 10 (alt 5'ss) | GAGGTGAGC | 74.52 | 60788     |
|          | exon 10 (alt 5'ss) | ACGGTGTGC | 71.72 | 60789     |
| LHX6     | exon 9 (alt 5'ss)  | CAGGTGAGC | 86.03 | 115429    |
|          | exon 9 (alt 5'ss)  | AAGGTAAT  | 85.34 | 115431    |
| LOS1119  | exon 2 (alt 5'ss)  | TGTGTAAGC | 69.98 | 110895    |
|          | exon 2 (alt 5'ss)  | CAGGTGGGT | 86.56 | 110899    |
| LOC51053 | exon 1 (alt 5'ss)  | CCAGTAGT  | 80.27 | 54576     |
|          | exon 1 (alt 5'ss)  | TGGGTAAAG | 83.76 | 54577     |
| LOC51329 | exon 2 (alt 5'ss)  | GAGGTGAGA | 78.01 | 115163    |
|          | exon 1 (alt 5'ss)  | AGGGTAGGA | 75.91 | 115164    |
|          | exon 2 (alt 5'ss)  | GGGGTGGT  | 75.91 | 115166    |
|          | exon 2 (alt 5'ss)  | AAGGTGAGA | 60.2  | 115169    |
|          | exon 2 (alt 5'ss)  | AGGGTGGG  | 88.13 | 115172    |
| LOC51596 | exon 1 (alt 5'ss)  | CAGGTAGA  | 94.58 | 113295    |
|          | exon 1 (alt 5'ss)  | GTGGTAGT  | 86.21 | 113306    |
| LOC51604 | (alt 5'ss)         | GGGTGAGT  | 73.99 | 113309    |
|          | (alt 5'ss)         | CAGGTGGG  | 80.47 | 128004    |
| LOC51645 | (alt 5'ss)         | CTGTAAAT  | 79.93 | 128044    |
|          | exon 2 (alt 5'ss)  | TTGGTAATC | 68.76 | 69441     |
| LOC55871 | exon 2 (alt 5'ss)  | CAAGTAAT  | 71.37 | 69442     |
|          | exon 2 (alt 5'ss)  | TAGGTAAGT | 90.22 | 69444     |
|          | exon 5 (alt 5'ss)  | CAGGTGAGC | 67.71 | 211412    |
| MAGED2   | exon 5 (alt 5'ss)  | ATGGTAGT  | 91.62 | 211413    |
|          | exon 9 (alt 5'ss)  | CAAGTAGA  | 79.58 | 211689    |
| MAPK7    | exon 2 (alt 5'ss)  | TAGGTAATC | 71.2  | 219690    |
|          | exon 2 (alt 5'ss)  | CAAGTAGT  | 88.13 | 228256    |
|          | exon 2 (alt 5'ss)  | GGGGTAGT  | 86.21 | 228257    |
| MBD4     | exon 3 (alt 5'ss)  | CTGGTAGA  | 83.94 | 225423    |
|          | exon 3 (alt 5'ss)  | AAGGTATCC | 69.1  | 225424    |
|          | exon 3 (alt 5'ss)  | TTGGTAAT  | 74.34 | 225428    |
|          | exon 3 (alt 5'ss)  | CAGGTGAGG | 92.49 | 225429    |
| MLF1     | exon 1 (alt 5'ss)  | CTCGTAGT  | 76.43 | 129086    |
|          | exon 1 (alt 5'ss)  | AAGGTATCC | 70.33 | 129089    |
| MRPL36   | exon 1 (alt 5'ss)  | CAGGTGAGG | 88.13 | 149572    |
|          | exon 1 (alt 5'ss)  | CAGGTGAGG | 86.03 | 149579    |
| MRPS12   | exon 1 (alt 5'ss)  | GAGGTGGT  | 76.96 | 204243    |
|          | exon 1 (alt 5'ss)  | GAGGTATT  | 72.25 | 204244    |
| MTCH1    | exon 9 (alt 5'ss)  | AGCGTAGT  | 75.56 | 39496     |
|          | exon 9 (alt 5'ss)  | CAGGTGGT  | 80.1  | 39498     |
| MUS81    | exon 10 (alt 5'ss) | AAGTAATT  | 85.34 | 30232     |
|          | exon 10 (alt 5'ss) | CAGGTACCT | 75.39 | 30233     |
| NAP1L1   | (alt 5'ss)         | GAGGTGAGT | 81.84 | 286873    |
|          | (alt 5'ss)         | AGGGTGGT  | 88.48 | 28688     |
| NCF1     | exon 8 (alt 5'ss)  | GAGGTGAT  | 73.47 | 244196    |
|          | exon 8 (alt 5'ss)  | CAGGTGAGG | 84.29 | 244198    |
| NNAT     | exon 2 (alt 5'ss)  | AAGGTGTC  | 65.79 | 105773    |
|          | exon 2 (alt 5'ss)  | GAGGTATAC | 66.66 | 105777    |
| NOP56    | (alt 5'ss)         | CAGGTACCA | 69.98 | 27730     |
|          | (alt 5'ss)         | CAGGTGAGC | 84.81 | 27731     |
| NOT56L   | exon 1 (alt 5'ss)  | GAGGTGGG  | 77.83 | 158777    |
|          | exon 1 (alt 5'ss)  | CAGGTGAGT | 84.64 | 158779    |
| NUP62    | exon 1 (alt 5'ss)  | GAGGTGAGC | 91.27 | 205088    |
|          | exon 1 (alt 5'ss)  | AAGGTGAGA | 80.27 | 205091    |
|          | exon 1 (alt 5'ss)  | GTGGTACCC | 80.62 | 205092    |
| OCIA     | exon 1 (alt 5'ss)  | CCGTAAGT  | 76.09 | 97986     |
|          | exon 1 (alt 5'ss)  | CCGTAAGT  | 64.39 | 97989     |
|          | exon 2 (alt 5'ss)  | GAGGTGGT  | 83.42 | 98001     |
|          | exon 2 (alt 5'ss)  | CAGGTGAGA | 81.15 | 98004     |

| GENE    | EXON               | SEQUENCE  | S&S   | Splice Id |
|---------|--------------------|-----------|-------|-----------|
| ODF2    | (alt 5'ss)         | AAGGTACTT | 74.52 | 99687     |
|         | (alt 5'ss)         | GAGGTAGCC | 80.97 | 99689     |
| PAEP    | exon 6 (alt 5'ss)  | TGGGTAAAG | 69.98 | 128202    |
|         | exon 6 (alt 5'ss)  | CAGGTGAAA | 67.36 | 133284    |
| PCMT1   | exon 8 (alt 5'ss)  | AAGGTGAAA | 76.78 | 133285    |
|         | exon 1 (alt 5'ss)  | CTGGTAAGG | 88.13 | 230871    |
| PDCD10  | exon 1 (alt 5'ss)  | GGGGTAAGC | 70.85 | 230876    |
|         | exon 1 (alt 5'ss)  | CAGGTGAGG | 89.35 | 230878    |
|         | exon 1 (alt 5'ss)  | TTGGTAAGT | 75.91 | 230880    |
| PK1.3   | exon 1 (alt 5'ss)  | GAGGTGAGG | 89.35 | 137902    |
|         | exon 1 (alt 5'ss)  | GTGGTAAGT | 71.2  | 137904    |
| PLP1    | exon 3 (alt 5'ss)  | ACGGTAACA | 72.25 | 243135    |
|         | exon 3 (alt 5'ss)  | AAGGTGATC | 76.61 | 243137    |
| PPP1R7  | exon 57 (alt 5'ss) | GAGGTACTG | 67.71 | 225864    |
|         | exon 57 (alt 5'ss) | AAGGTGAGA | 90.57 | 225866    |
| POBP1   | exon 1 (alt 5'ss)  | CAGGTATCC | 71.2  | 228654    |
|         | exon 1 (alt 5'ss)  | TTGGTAAGC | 70.15 | 228655    |
| PRAME   | exon 1 (alt 5'ss)  | GGGGTGGT  | 75.91 | 228656    |
|         | exon 1 (alt 5'ss)  | CAGGTTTGT | 74.52 | 228654    |
| PRKCSH  | exon 12 (alt 5'ss) | AGAGTAAGT | 79.75 | 228585    |
|         | exon 12 (alt 5'ss) | GAGGTGAGG | 64.57 | 247174    |
| PSEN1   | exon 12 (alt 5'ss) | AAGGTCCTG | 78.53 | 247176    |
|         | exon 2 (alt 5'ss)  | ACTGTACTG | 68.06 | 228074    |
| PYCR1   | exon 2 (alt 5'ss)  | CAGGTGAGG | 70.85 | 228075    |
|         | exon 1 (alt 5'ss)  | GGGGTGGT  | 75.91 | 132999    |
| RAB7L1  | exon 1 (alt 5'ss)  | ACGGTAGCT | 67.36 | 133001    |
|         | exon 1 (alt 5'ss)  | TTGGTTTGT | 67.71 | 107284    |
| RASSF1  | exon 2 (alt 5'ss)  | CCGGTGGT  | 78.7  | 107286    |
|         | exon 2 (alt 5'ss)  | GTGGTAGC  | 80.62 | 231854    |
| RNF7    | exon 2 (alt 5'ss)  | CAGGTGAGA | 81.15 | 231855    |
|         | exon 1 (alt 5'ss)  | CAGGTGATG | 78.11 | 152076    |
| RPL17   | exon 1 (alt 5'ss)  | TGGGTAAAG | 82.54 | 152079    |
|         | exon 1 (alt 5'ss)  | GAGGTGAGT | 93.71 | 132172    |
|         | exon 1 (alt 5'ss)  | GGGGTCAAT | 79.75 | 132176    |
| SEC13L1 | exon 1 (alt 5'ss)  | GAGGTGAGG | 70.85 | 132179    |
|         | exon 2 (alt 5'ss)  | TTGGTGGG  | 70.33 | 132181    |
|         | exon 2 (alt 5'ss)  | AAAGTATGG | 72.07 | 132182    |
| SEC23B  | exon 27 (alt 5'ss) | ACTGTAAAT | 79.05 | 132184    |
|         | exon 27 (alt 5'ss) | AATGTAAAT | 86.91 | 132187    |
|         | exon 1 (alt 5'ss)  | ATGGTAGAT | 88.48 | 58364     |
| SIRT3   | exon 1 (alt 5'ss)  | GAGGTGAGG | 89.35 | 83854     |
|         | exon 1 (alt 5'ss)  | AAGGT     |       |           |
